# Supplementary material
Source: PubMed Central journal article supplement (PMC4187926)
Supplement: AAC.03501-14_zac010143277so1.pdf [file AAC.03501-14_zac010143277so1.pdf]

1  
2  
3  
4  
5  
6  
7  
8  
9  
10  
11  
12  
13

Supplemental Table to

Mutations in *mmpL* and in Cell-Wall Stress Stimulon Contribute to Resistance to  
Oxadiazole Antibiotics in Methicillin Resistant *Staphylococcus aureus*

Qiaobin Xiao, Sergei Vakulenko, Mayland Chang and Shahriar Mobashery#

Department of Chemistry and Biochemistry and Eck Institute for Global Health, University of  
Notre Dame, Notre Dame, IN 46556, USA

Running Head: *MmpL* contributes to oxadiazole resistance

#Address correspondence to Shahriar Mobashery, mobashery@nd.edu

14 **TABLE S1.** Primers for PCR-based sequencing.<sup>1</sup>

| Name    | Sequence (5'→3')                         |
|---------|------------------------------------------|
| COLm1F  | GAAATCAATCTAGGACAACCTAATAAAAGGAGAGAG     |
| COLm1R  | TTTCTTTTGTGGAATGATTTTATTATCGACC          |
| COLm2F  | GATAAAAGAGTAGATGAATTACTTGAAATGGTTGG      |
| COLm2R  | GCGCTCATAGATGTAACCTCATCGATTGG            |
| COLm3F  | GACCTTGATTTACCGGAAAAAACTGTTATC           |
| COLm3R  | GCTACCCATTTTCGGTATTGAAAAATGTG            |
| COLm4F  | CTAGCTGTTTAGAGTGTGAATCGGCTTTGGC          |
| COLm4R  | TGAAGTGATCGGAATTCATTGGGGCGG              |
| COLm5F  | CGACAATATGTACTTTAGTAGTTAAGCTCTTATATCCAGG |
| COLm5R  | CCATTATCAATTGCAATGGTTAATCATCTC           |
| COLm6F  | GGGTGCGATGCCGAAGCAATTATAATAGCAG          |
| COLm6R  | ATACCCGCTTGATAGCCAGTCATTGCTTTGGC         |
| COLm7F  | CCTCGTTTAATACTTTCATCGCTTCAACATATCC       |
| COLm7R  | GCTGTAGATAAGAATCGGGAACAAATGTCTCTG        |
| COLm8F  | CCTGTAATAGCTTTAATTATTTTTCAGCTGTTGGCGC    |
| COLm8R  | GGTGAACAAATTGGTGTAAATCAAAGCG             |
| COLm9F  | AATCAACGTCTAAATGGCTTAAACGTTC             |
| COLm9R  | GTGCACGATATATTCATAGTACAGACTCAGTATTTG     |
| COLm10F | CCATTAGGATTTGGATAACCAATGACTG             |
| COLm10R | CATCGGTCGAATATAACATAAAAAACGTC            |
| COLm11F | GGTTTTGGTTGGTATATTTCAAATTTTGGTAAC        |

---

|                           |                                          |
|---------------------------|------------------------------------------|
| COLm11R                   | CATATCGAATTAAGAAAAGTTACTTACGCCAATCAC     |
| COLm12F(27F) <sup>2</sup> | GGCGTCTGAATAATTTGCAATAAAAATGC            |
| COLm12R(27R) <sup>2</sup> | CATCTTTGCTGTCTAATTTAGGAACTGCATG          |
| COLm13F(28F) <sup>2</sup> | ACTCGCTCTCCAGTTATATTTCCATTTATACCTGC      |
| COLm13R(28R) <sup>2</sup> | GTGAATGGCAAGCCTGCTATTGAATGG              |
| COLm14F                   | GACCTTCCATTACATTTTCTAATGCCGTC            |
| COLm14R                   | CGGTATGACGTATGGTCAAACGATACAACGTATC       |
| COLm15F                   | CAACATATGAAATTGATTGGGAAAATCACAAAG        |
| COLm15R                   | CCATTTTGGCAGTTTTGAAAATACCGTCC            |
| COLm16F                   | TGATGGATATCACTATACGCCTATCTTTCCAA         |
| COLm16R                   | GCAATTCATACTTTGTTGTGGGAGAAGCTTTGAC       |
| COLm17F                   | ATGCATAATCGATACCAACTGCTAGTCCAATC         |
| COLm17R                   | CGTTAGATGATATTA AAAAAGATGACAAGCACATTG    |
| COLm18F                   | AAGCATTGTCGAGTAGCTTGCTACAATTG            |
| COLm18R                   | GAAAATGTTATCAATATCTTCGCCAGGCC            |
| COLm19F                   | GGTATGACATCAATTA AAAATAGTGTCATTGTTCGC    |
| COLm19R                   | GTATGGGACATGATGGTATGAAACAAGGC            |
| COLm20F                   | GTTGAGATAAGGGAGATTTTCAGAGTCGTG           |
| COLm20R                   | AAAGAAGTTTCATCAAATAAACTGTGACCATC         |
| COLm21F                   | GAAATTGGACCGGCAGAAGAAATTTATC             |
| COLm21R                   | ACACCTAACACCGGTTTGTACCTTTTCC             |
| COLm22F                   | GCTGAAACGTCAGGTATATTAATTTTAAGCGC         |
| COLm22R                   | GTAGCTACTGAAAATTTCAATACCTGAATCAACTA ACTC |

---

---

|                           |                                       |
|---------------------------|---------------------------------------|
| COLm23F(24F) <sup>2</sup> | GTTTAATATCAGGGGCTGCTTAACCGCATCCG      |
| COLm23R(24R) <sup>2</sup> | GGTAATTCTGTGCCACTATTAGCATCAATCGCC     |
| COLm25F                   | CAACTGTTCCCCCTCCGGTAAATGCG            |
| COLm25R                   | GGAGTGACGTACATGATCCGTCTAGG            |
| COLm26F                   | GCCTCATGGAACGATTAGATTACTGGCTACTGC     |
| COLm26R                   | CGCTTGTTACAGGTCCGGTGATTGCTTGG         |
| COLm29F                   | CACCAAATCCCCTCACTACTGCCATAGTGAG       |
| COLm29R                   | GATTAGTCATATTACCGGATTTCTAGTCGCTTTTGTG |
| COLm30F                   | AGATCCTGAAACTGGAGAAATCATTGAAG         |
| COLm30R                   | GCTATCGCTGTCCGCATCAGAGT               |
| COLm31F                   | CTCCAGTTAATGGATTTTTTTAGTGTTGGCGTCG    |
| COLm31R                   | AAGGTGAGAAGACAATAACGACACCAACAC        |

---

15 <sup>1</sup> Primers are named in accordance with the mutation number. For example, the primer set  
16 COLm1F and COLm1R are used for the confirmation of mutation 1. <sup>2</sup>Same primer set was used  
17 to PCR amplify the two mutations.

18
